# Supplementary material
Source: Royal Society of Chemistry journal article supplement (doi:10.1039/d5ea00162e)
Supplement: d5ea00162e1.pdf [file d5ea00162e1.pdf]

## **Understanding the Atmospheric Cycle of Microplastics: From Emission to Deposition**

Jiajia Shan<sup>a</sup>, Bomingham Yu<sup>a</sup>, Jindong Guo<sup>a</sup>, Wenliang Chen<sup>a</sup>, Ying Su<sup>a</sup>, Xue Wang<sup>a\*</sup>,  
Xin Wang<sup>b\*</sup>

<sup>a</sup> School of Chemical Engineering, Ocean and Life Sciences, Dalian University of Technology, Liaoning, China, 124221

<sup>b</sup> School of Environmental Science and Technology, Dalian University of Technology, Liaoning, China, 116081

**Corresponding author:** Xue Wang, Email: [wangxue@dlut.edu.cn](mailto:wangxue@dlut.edu.cn); Xin Wang, Email: [wxin@dlut.edu.cn](mailto:wxin@dlut.edu.cn)

Table S1 A Summary of Atmospheric Microplastic Deposition Flux Reported in the Literature.

| Country        | Deposition Flux<br>(particles • m <sup>-2</sup> • d <sup>-1</sup> ) | Polymer Type                                                                                                                                                                                                 | Morphology                                                                                                                                                                 | Size Range                                                | reference |
|----------------|---------------------------------------------------------------------|--------------------------------------------------------------------------------------------------------------------------------------------------------------------------------------------------------------|----------------------------------------------------------------------------------------------------------------------------------------------------------------------------|-----------------------------------------------------------|-----------|
| Brazil         | Fibers:307.2±214.60<br>Particles:2.20±1.99                          | Fibers:<br>Polyester(100%)<br>Particles:<br>PE (59%)<br>PP (26%)<br>SIS (4%)<br>PEA(4%)<br>PET(4%)<br>PVA(3%)                                                                                                | Fragments (64%)<br>Foam(23%)<br>Film(9%)<br>Granule(4%)                                                                                                                    | Fibers:<br>50.00-989.12µm<br>Particles:<br>50.03-510.67µm | [1]       |
| Brazil         | Fibers:105.45±50.03<br>Particles17.75±16.26                         | Polyester(76%)<br>PET(9%)<br>PVC(9%)<br>PAN(6%)<br>Particles:<br>PE (67%)<br>PET (25%)<br>PS (8%)                                                                                                            | Fragments (74%)<br>Foam(13%)<br>Film(8%)<br>Granule(5%)                                                                                                                    | most common:<br>100-200 µm                                | [1]       |
| Turkey         | Fibers:13.6-155.7<br>Fragments+Films:<br>2.4-11.2                   | PE(85%)                                                                                                                                                                                                      | Fibers(84%)<br>Fragments(10%)<br>Films(6%)                                                                                                                                 | Fibers:0.5-2mm<br>Films:0.5-1mm<br>and 200-300 µm         | [2]       |
| United Kingdom | Fibers: 510-925<br>Non-fibers:12-99                                 | Fibers:<br>PAN(66.7%)PET(18.8%)<br>PA (9.4%) Other (5.2%)<br>Non-fibers:<br>PP(12.5%) PVC(9.4%)<br>PE (12.5%) PET(11.5%)<br>PS (18.8%) PUR(11.5%)<br>Pol. Petr. Res.(9.4%)<br>Acrylic(5.2%)<br>Others (9.4%) | Fibers:<br>Cellulose(69.3%),<br>Petro-chemical(16.9%)<br>NI(10.0%)<br>R.Cellulose(3.8%)<br>Non-fibers:<br>Fragments(63.6%)F<br>ilms(25%)<br>Granules(6.8%)<br>Foams (4.5%) | Fibers:<br>905±641µm<br>Non-fibers:<br>164±167µm          | [3]       |
| Iran           | 24.0-2455.2                                                         | PET(53%), PVC, PTFE,<br>PS, PP, PE, Nylon                                                                                                                                                                    | Fibers dominant                                                                                                                                                            | <100,100-250,<br>250-500,500-<br>1000, >1000µm            | [5]       |
| Iran           | 40.8-309.6                                                          | PET, PVC, PTFE, PS, PP,<br>PE, Nylon                                                                                                                                                                         | Fibers dominant                                                                                                                                                            | <100,100-250,<br>250-500,500-<br>1000, >1000µm            | [5]       |
| Iran           | 0-1416.0                                                            | PET, PVC, PTFE, PS, PP,<br>PE, Nylon                                                                                                                                                                         | Fibers dominant                                                                                                                                                            | <100,100-250,<br>250-500,500-                             | [5]       |

|          |                                                             |                                                                                |                                                     |                                                                                  |      |
|----------|-------------------------------------------------------------|--------------------------------------------------------------------------------|-----------------------------------------------------|----------------------------------------------------------------------------------|------|
| Iran     | 0-662.4                                                     | PET, PVC, PTFE, PS, PP, PE, Nylon                                              | Fibers dominant                                     | 1000, >1000µm<br><100,100-250,<br>250-500,500-<br>1000, >1000µm                  | [5]  |
| Iran     | 0-2419.2                                                    | PET, PVC, PTFE, PS, PP, PE, Nylon                                              | Fibers dominant                                     | <100,100-250,<br>250-500,500-<br>1000, >1000µm                                   | [5]  |
| Iran     | 0-1116.0                                                    | PET, PVC, PTFE, PS, PP, PE, Nylon                                              | Fibers dominant                                     | <100,100-250,<br>250-500,500-<br>1000, >1000µm                                   | [5]  |
| Colombia | Fibers:5,375,000<br>Films:1,685,000<br>Fragments:1,255,000  | PS, PE, PP, PVC, PET                                                           | Fibers<br>Films<br>Fragments                        | 10–5000 µm                                                                       | [8]  |
| Colombia | Fibers:10,312,000<br>Films:2,932,000<br>Fragments:2,472,000 | PS, PE, PP, PVC, PET                                                           | Fibers<br>Films<br>Fragments                        | 10–5000 µm                                                                       | [8]  |
| Colombia | Fibers:1,386,000<br>Films:516,000<br>Fragments:756,000      | PS, PE, PP, PVC, PET                                                           | Fibers<br>Films<br>Fragments                        | 10–5000 µm                                                                       | [8]  |
| China    | 353.83 ± 159.17                                             | PET, PE, PA, PS, PVC, PMMA                                                     | Fragments(44.4%)<br>Fibers(47.5%)                   | 50-500 µm<br><br>20-50µm(22%)<br>50-100µm(51%)                                   | [10] |
| China    | 302.31±107.40                                               | PA(61%)<br>PP(6%)<br>PE(11%)<br>PES(11%)<br>EP(10%)Others (2%)                 | Fragments(80%)<br>Fibers (16%)<br>Others(4%)        | 100-<br>200µm(13%)<br>200-500µm(5%)<br>500-<br>1000µm(5%)<br>1000-<br>5000µm(5%) | [13] |
| Germany  | 183 ± 124                                                   | PP(38%), PE (24%),<br>PET(9%), PVC(8%),<br>Others                              | Fragments(96.9%),<br>Fibers (2.9%)<br>Spheres(0.2%) | Fragments:<br>11-522 µm<br>Fibers:<br>499-1945µm                                 | [19] |
| Germany  | 73 ± 21                                                     | PP(46%), PE (14%),<br>PET(7%), PVC, PS,<br>SI(11%),Others                      | Fragments(96.9%),<br>Fibers (2.9%)<br>Spheres(0.2%) | Fragments:<br>11-522 µm<br>Fibers:<br>499-1945µm                                 | [19] |
| Germany  | 114 ± 81                                                    | PP(35%), PE (18%),<br>PET, PVC(8%), PS(16%),<br>SI,PAN,EVAc,ABS,<br>PBT,Others | Fragments(96.9%),<br>Fibers (2.9%)<br>Spheres(0.2%) | Fragments:<br>11-522 µm<br>Fibers:<br>499-1945µm                                 | [19] |
| Germany  | 59 ± 30                                                     | PP(37%), PE (10%),<br>PET(41%), Others                                         | Fragments(96.9%),<br>Fibers (2.9%)                  | Fragments:<br>11-522 µm                                                          | [19] |

|         |                   |                                                                                                                                                      |                                                     |                                                                                          |      |
|---------|-------------------|------------------------------------------------------------------------------------------------------------------------------------------------------|-----------------------------------------------------|------------------------------------------------------------------------------------------|------|
|         |                   |                                                                                                                                                      | Spheres(0.2%)                                       | Fibers:<br>499-1945µm                                                                    |      |
| Germany | 48 ± 15           | PP(35%), PE<br>PET(16%), PS(14%)<br>Others                                                                                                           | Fragments(96.9%),<br>Fibers (2.9%)<br>Spheres(0.2%) | Fragments:<br>11-522 µm<br>Fibers:<br>499-1945µm                                         | [19] |
| Germany | 29 ± 26           | PP(65%), PE (8%)<br>PET(9%), PVC(9%)<br>PS(10%)                                                                                                      | Fragments(96.9%),<br>Fibers (2.9%)<br>Spheres(0.2%) | Fragments:<br>11-522 µm<br>Fibers:<br>499-1945µm                                         | [19] |
| Poland  | 10 ± 8            | PEST (41%)<br>PP (18%)<br>PE (14%)<br>PVC (14%)<br>EPM(9%)<br>PVA(9%)<br>PA (19%),<br>PET (21%),<br>PP (11%),<br>PVF (20%),<br>PE,PVA+PE,Others(22%) | Fibers(60%)<br>Fragments(26%)<br>Films (14%)        | Fibers:75-<br>5000µm;<br>Fragments:5-<br>750µm;<br>Films:10-<br>1520µm                   | [20] |
| China   | 1434.57 ± 730.82  | PA (20%),<br>PET (33%),<br>PP (23%),<br>PVF,PE,PVA+PE, Others                                                                                        | Fibers (71%)<br>Films (21%)<br>Granules (8%)        | 500-1000µm<br>(20%), 1000-<br>3000µm (11%),<br>3000-5000µm<br><500µm(61%),<br>500-1000µm | [21] |
| China   | 5094.93 ± 3431.01 | PA (39%),<br>PET (26%),<br>PP (20%),<br>PVF,PVA+PE, Others                                                                                           | Fibers (79%)<br>Films (16%)<br>Granules (6%)        | 500-1000µm<br>(24%), 1000-<br>3000µm (14%),<br>3000-5000µm<br><500µm(75%),<br>500-1000µm | [21] |
| China   | 4072.81 ± 2904.33 | PA (28%),<br>PET (33%),<br>PP (15%),<br>PVF (10%),<br>PE, PVA+PE,<br>PET+PP, Others                                                                  | Fibers (69%)<br>Films (25%)<br>Granules (5%)        | 500-1000µm<br>(15%), 1000-<br>3000µm (9%),<br>3000-5000µm<br><500µm(76%),<br>500-1000µm  | [21] |
| China   | 1756.72 ± 1181.85 | PA (30%),<br>PET (21%),<br>PP (20%),<br>PVF, PE,PVA+PE,<br>Others(10%)                                                                               | Fibers (73%)<br>Films (18%)<br>Granules (9%)        | 500-1000µm<br>(13%), 1000-<br>3000µm (10%),<br>3000-5000µm<br><500µm(78%),<br>500-1000µm | [21] |
| China   | 2619.74 ± 620.73  | PA (29%),<br>PET (27%),                                                                                                                              | Fibers (72%)<br>Films (17%)                         | 500-1000µm<br>(15%), 1000-<br>3000µm (7%)                                                | [21] |
| China   | 4588.57 ± 3738.91 |                                                                                                                                                      |                                                     | <500µm(69%),<br>500-1000µm                                                               | [21] |



|            |                                |                                                               |                               |                                                                 |      |
|------------|--------------------------------|---------------------------------------------------------------|-------------------------------|-----------------------------------------------------------------|------|
| Germany    | 136.5                          | PE(48.8%),EVAC(22.0%)                                         | fragments(95%)<br>fibers (5%) | <63 $\mu\text{m}$<br>63-300 $\mu\text{m}$<br>>300 $\mu\text{m}$ | [27] |
| Germany    | 331.4                          | PE(48.8%),EVAC(22.0%)                                         | fragments(95%)<br>fibers (5%) | <63 $\mu\text{m}$<br>63-300 $\mu\text{m}$<br>>300 $\mu\text{m}$ | [27] |
| Germany    | 512.0                          | PE(48.8%),EVAC(22.0%)                                         | fragments(95%)<br>fibers (5%) | <63 $\mu\text{m}$<br>63-300 $\mu\text{m}$<br>>300 $\mu\text{m}$ | [27] |
| Germany    | 343.1                          | PE(48.8%),EVAC(22.0%)                                         | fragments(95%)<br>fibers (5%) | <63 $\mu\text{m}$<br>63-300 $\mu\text{m}$<br>>300 $\mu\text{m}$ | [27] |
| Bangladesh | Indoor:<br>$179 \times 10^3$   | Polyester, Nylon,<br>Regenerated cellulose,<br>Natural fibers | Fibrous<br>non-fibrous        | 100-180 $\mu\text{m}$                                           | [29] |
| Bangladesh | Outdoor:<br>$40.2 \times 10^3$ | Polyester, Nylon,<br>Regenerated cellulose,<br>Natural fibers | Fibrous<br>non-fibrous        | <100 $\mu\text{m}$                                              | [29] |

Table S2 A Summary of Atmospheric Microplastic Deposition Flux Reported in the Literature

| Country | Deposition Flux<br>(particles $\cdot$ g <sup>-1</sup> ) | Polymer Type                             | Morphology                                                   | Size Range                                                           | reference |
|---------|---------------------------------------------------------|------------------------------------------|--------------------------------------------------------------|----------------------------------------------------------------------|-----------|
| China   | 38.85                                                   | PP PA PE<br>PS PET Silicone<br>PC PU PVC | Fragments(70.9%)<br>Fibers(9.57%)<br>Pellets/Spheres(19.53%) | 20-100 $\mu\text{m}$<br>100-200 $\mu\text{m}$<br>> 200 $\mu\text{m}$ | [11]      |
| China   | 7.25                                                    | PP PA PE<br>PS PET Silicone<br>PC PU PVC | Fragments(70.9%)<br>Fibers(9.57%)<br>Pellets/Spheres(19.53%) | 20-100 $\mu\text{m}$<br>100-200 $\mu\text{m}$<br>> 200 $\mu\text{m}$ | [11]      |
| China   | 13.64                                                   | PP PA PE<br>PS PET Silicone<br>PC PU PVC | Fragments(70.9%)<br>Fibers(9.57%)<br>Pellets/Spheres(19.53%) | 20-100 $\mu\text{m}$<br>100-200 $\mu\text{m}$<br>> 200 $\mu\text{m}$ | [11]      |
| China   | 172.73                                                  | PP PA PE<br>PS PET Silicone<br>PC PU PVC | Fragments(70.9%)<br>Fibers(9.57%)<br>Pellets/Spheres(19.53%) | 20-100 $\mu\text{m}$<br>100-200 $\mu\text{m}$<br>> 200 $\mu\text{m}$ | [11]      |
| China   | 481.39                                                  | PP PA PE<br>PS PET Silicone<br>PC PU PVC | Fragments(70.9%)<br>Fibers(9.57%)<br>Pellets/Spheres(19.53%) | 20-100 $\mu\text{m}$<br>100-200 $\mu\text{m}$<br>> 200 $\mu\text{m}$ | [11]      |
| China   | 22.95                                                   | PP PA PE<br>PS PET Silicone              | Fragments(70.9%)<br>Fibers(9.57%)                            | 20-100 $\mu\text{m}$<br>100-200 $\mu\text{m}$                        | [11]      |

|        |                                     |                                                  |                                                                      |                                   |      |
|--------|-------------------------------------|--------------------------------------------------|----------------------------------------------------------------------|-----------------------------------|------|
|        |                                     | PC PU PVC                                        | Pellets/Spheres(19.53%)                                              | > 200 μm                          |      |
| China  | 202.29                              | PP PA PE<br>PS PET Silicone<br>PC PU PVC         | Fragments(70.9%)<br>Fibers(9.57%)<br>Pellets/Spheres(19.53%)         | 20-100μm<br>100-200μm<br>> 200 μm | [11] |
| China  | 115.19                              | PP PA PE<br>PS PET Silicone<br>PC PU PVC         | Fragments(70.9%)<br>Fibers(9.57%)<br>Pellets/Spheres(19.53%)         | 20-100μm<br>100-200μm<br>> 200 μm | [11] |
| China  | 197.03                              | PP PA PE<br>PS PET Silicone<br>PC PU PVC         | Fragments(70.9%)<br>Fibers(9.57%)<br>Pellets/Spheres(19.53%)         | 20-100μm<br>100-200μm<br>> 200 μm | [11] |
| China  | 24.42                               | PP PA PE<br>PS PET Silicone<br>PC PU PVC         | Fragments(70.9%)<br>Fibers(9.57%)<br>Pellets/Spheres(19.53%)         | 20-100μm<br>100-200μm<br>> 200 μm | [11] |
| China  | 224.76                              | PP PA PE<br>PS PET Silicone<br>PC PU PVC         | Fragments(70.9%)<br>Fibers(9.57%)<br>Pellets/Spheres(19.53%)         | 20-100μm<br>100-200μm<br>> 200 μm | [11] |
| China  | 170.55                              | PP PA PE<br>PS PET Silicone<br>PC PU PVC         | Fragments(70.9%)<br>Fibers(9.57%)<br>Pellets/Spheres(19.53%)         | 20-100μm<br>100-200μm<br>> 200 μm | [11] |
| Poland | 0.076-0.295<br>dry deposition       | Fibers: PP<br>Fragments: PS,PE                   | Fibers, Fragments<br>Granules, Films<br>Fibers(54.46%)               | <500 μm<br>(55%-82%)              | [16] |
| China  | 0.13542 ± 0.04958<br>dry deposition | PE, PP, PS, PET, Nylon<br>(PA)                   | Fragments(25.23%)<br>Granules(18.77%)<br>Foam(1.23%)<br>Films(0.31%) | 0.63 ± 0.43 mm                    | [17] |
| India  | 0.105-0.475                         | PP, PET, HDPE, PS, SAA<br>copolymer, plasta zinc | Fibers,Fragments,<br>Foams,Films,Pellets                             | <5mm                              | [18] |
| India  | 0.125-0.4575                        | PP, PET, HDPE, PS, SAA<br>copolymer, plasta zinc | Fibers,Fragments,<br>Foams,Films,Pellets                             | <5mm                              | [18] |
| India  | 0.072.5-0.2225                      | PP, PET, HDPE, PS, SAA<br>copolymer, plasta zinc | Fibers,Fragments,<br>Foams,Films,Pellets                             | <5mm                              | [18] |

| Country | Deposition Flux<br>(particles • m <sup>-2</sup> ) | Polymer Type          | Morphology | Size Range    | reference |
|---------|---------------------------------------------------|-----------------------|------------|---------------|-----------|
| Ireland | 25,919                                            | PET (71%), PAN (11%), | Fibrous    | Median0.89 mm | [28]      |

|         |        |                                                                        |                                          |                                               |      |
|---------|--------|------------------------------------------------------------------------|------------------------------------------|-----------------------------------------------|------|
| Ireland | 23,526 | PE (11%), PP (4%)<br>PET (71%), PAN (11%),<br>PE (11%), PP (4%)        | Fibrous                                  | Median 0.93 mm                                | [28] |
| Ireland | 29,410 | PET (71%), PAN (11%),<br>PE (11%), PP (4%)                             | Fibrous                                  | Median 0.98 mm                                | [28] |
| Ireland | 37,217 | PET (71%), PAN (11%),<br>PE (11%), PP (4%)                             | Fibrous                                  | Median 0.73 mm                                | [28] |
| China   | 27,000 | Cellophane (>50%)<br>PET (>30%)<br>PP, EPDM, PU, PA, PEA,<br>ALK, PVAc | Fibers<br>Films<br>Fragments<br>Granules | <1 mm<br>1-2 mm<br>2-3 mm<br>3-4 mm<br>4-5 mm | [30] |
| China   | 89,000 | Cellophane (>50%)<br>PET (>30%)<br>PP, EPDM, PU, PA, PEA,<br>ALK, PVAc | Fibers<br>Films<br>Fragments<br>Granules | <1 mm<br>1-2 mm<br>2-3 mm<br>3-4 mm<br>4-5 mm | [30] |
| China   | 73,700 | Cellophane (>50%)<br>PET (>30%)<br>PP, EPDM, PU, PA, PEA,<br>ALK, PVAc | Fibers<br>Films<br>Fragments<br>Granules | <1 mm<br>1-2 mm<br>2-3 mm<br>3-4 mm<br>4-5 mm | [30] |

Table S3 A Summary of Atmospheric Microplastic Density in the Air Reported in the Literature.

| Country | Density<br>(particles • m <sup>-3</sup> ) | Polymer Type                                                                               | Morphology                      | Size Range                                                                                                                                                | reference |
|---------|-------------------------------------------|--------------------------------------------------------------------------------------------|---------------------------------|-----------------------------------------------------------------------------------------------------------------------------------------------------------|-----------|
| China   | 27.6±14.7                                 | PE(27.7%) PET(24.2%)<br>PA(17.6%) PS(10.9%)<br>PP(6.4%) PVC(4.7%)<br>PC(3.6%) Other(5.1%)  | Fragment(87.0%)<br>Fiber(13.0%) | 5.9-30µm(63%)<br>30-100µm(32%)<br>100-<br>300µm(3.5%)<br>300-<br>1000µm(1.4%)<br>1000-<br>5000µm(0.6%)<br>5.9-30µm(59%)<br>30-100µm(34%)<br>100-300µm(5%) | [4]       |
| China   | 15.6±4.4                                  | PE(17.0%) PET(30.7%)<br>PA(14.7%) PS(11.0%)<br>PP(6.4%) PVC(10.1%)<br>PC(3.7%) Other(6.4%) | Fragment(82.9%)<br>Fiber(17.1%) | 300-<br>1000µm(1.6%)<br>1000-<br>5000µm(0.4%)<br>5.9-30µm(67%)<br>30-100µm(32%)<br>100-300µm(1%)                                                          | [4]       |
| China   | 8.1±3.0                                   | PE(32.5%) PET(21.3%)<br>PA(15.0%) PS(7.5%)<br>PP(10.0%) PVC(5.0%)                          | Fragment(91.4%)<br>Fiber(8.6%)  | 5.9-30µm(67%)<br>30-100µm(32%)<br>100-300µm(1%)                                                                                                           | [4]       |

|       |                           |                                                                                                                                            |                                                          |                                                         |     |
|-------|---------------------------|--------------------------------------------------------------------------------------------------------------------------------------------|----------------------------------------------------------|---------------------------------------------------------|-----|
|       |                           | Other(8.8%)<br>PA(37.5%) CPE(14.1%)<br>PET(9.8%) PU(8.1%)<br>PVC(6.3%)PE(5.2%)<br>Fluororubber(3.7%)<br>EVA(3.2%) EAA(2%)<br>Others(10.1%) | Fibers(85.55%),<br>Fragments<br>(13.29%)<br>Films(1.16%) | Summer:700.1±<br>682.16µm<br>Autumn:785.59<br>±558.56µm | [6] |
| China | Summer:<br>0.0925±0.0498  |                                                                                                                                            |                                                          |                                                         |     |
|       |                           | Other(8.8%)<br>PA(37.5%) CPE(14.1%)<br>PET(9.8%) PU(8.1%)<br>PVC(6.3%)PE(5.2%)<br>Fluororubber(3.7%)<br>EVA(3.2%) EAA(2%)<br>Others(10.1%) | Fibers(85.55%),<br>Fragments<br>(13.29%)<br>Films(1.16%) | Summer:700.1±<br>682.16µm<br>Autumn:785.59<br>±558.56µm | [6] |
| China | Autumn:<br>0.0573±0.0397  |                                                                                                                                            |                                                          |                                                         |     |
|       |                           | Other(8.8%)<br>PA(37.5%) CPE(14.1%)<br>PET(9.8%) PU(8.1%)<br>PVC(6.3%)PE(5.2%)<br>Fluororubber(3.7%)<br>EVA(3.2%) EAA(2%)<br>Others(10.1%) | Fibers(85.55%),<br>Fragments<br>(13.29%)<br>Films(1.16%) | Summer:700.1±<br>682.16µm<br>Autumn:785.59<br>±558.56µm | [6] |
| China | Summer:<br>0.0583±0.0557  |                                                                                                                                            |                                                          |                                                         |     |
|       |                           | Other(8.8%)<br>PA(37.5%) CPE(14.1%)<br>PET(9.8%) PU(8.1%)<br>PVC(6.3%)PE(5.2%)<br>Fluororubber(3.7%)<br>EVA(3.2%) EAA(2%)<br>Others(10.1%) | Fibers(85.55%),<br>Fragments<br>(13.29%)<br>Films(1.16%) | Summer:700.1±<br>682.16µm<br>Autumn:785.59<br>±558.56µm | [6] |
| China | Autumn:<br>0.0455 ±0.0140 |                                                                                                                                            |                                                          |                                                         |     |
|       |                           | Other(8.8%)<br>PA(37.5%) CPE(14.1%)<br>PET(9.8%) PU(8.1%)<br>PVC(6.3%)PE(5.2%)<br>Fluororubber(3.7%)<br>EVA(3.2%) EAA(2%)<br>Others(10.1%) | Fibers(85.55%),<br>Fragments<br>(13.29%)<br>Films(1.16%) | Summer:700.1±<br>682.16µm<br>Autumn:785.59<br>±558.56µm | [6] |
| China | Summer:<br>0.0925±0.0498  |                                                                                                                                            |                                                          |                                                         |     |
|       |                           | Other(8.8%)<br>PA(37.5%) CPE(14.1%)<br>PET(9.8%) PU(8.1%)<br>PVC(6.3%)PE(5.2%)<br>Fluororubber(3.7%)<br>EVA(3.2%) EAA(2%)<br>Others(10.1%) | Fibers(85.55%),<br>Fragments<br>(13.29%)<br>Films(1.16%) | Summer:700.1±<br>682.16µm<br>Autumn:785.59<br>±558.56µm | [6] |
| China | Autumn:<br>0.0573±0.0397  |                                                                                                                                            |                                                          |                                                         |     |
|       |                           | Other(8.8%)<br>PA(37.5%) CPE(14.1%)<br>PET(9.8%) PU(8.1%)<br>PVC(6.3%)PE(5.2%)<br>Fluororubber(3.7%)<br>EVA(3.2%) EAA(2%)<br>Others(10.1%) | Fibers(85.55%),<br>Fragments<br>(13.29%)<br>Films(1.16%) | Summer:700.1±<br>682.16µm<br>Autumn:785.59<br>±558.56µm | [6] |
| China | Summer:<br>0.0742±0.0083  |                                                                                                                                            |                                                          |                                                         |     |
|       |                           | Other(8.8%)<br>PA(37.5%) CPE(14.1%)<br>PET(9.8%) PU(8.1%)<br>PVC(6.3%)PE(5.2%)<br>Fluororubber(3.7%)<br>EVA(3.2%) EAA(2%)<br>Others(10.1%) | Fibers(85.55%),<br>Fragments<br>(13.29%)<br>Films(1.16%) | Summer:700.1±<br>682.16µm<br>Autumn:785.59<br>±558.56µm | [6] |
| China | Autumn:                   | PA(37.5%) CPE(14.1%)                                                                                                                       | Fibers(85.55%),                                          | Summer:700.1±                                           | [6] |

|      |                                           |                                                                                                                       |                                                                                                                                                    |                                                                                                                                                                                                                                                                                                                                                                                                                                               |     |
|------|-------------------------------------------|-----------------------------------------------------------------------------------------------------------------------|----------------------------------------------------------------------------------------------------------------------------------------------------|-----------------------------------------------------------------------------------------------------------------------------------------------------------------------------------------------------------------------------------------------------------------------------------------------------------------------------------------------------------------------------------------------------------------------------------------------|-----|
|      | 0.0290±0.0030                             | PET(9.8%) PU(8.1%)<br>PVC(6.3%)PE(5.2%)<br>Fluororubber(3.7%)<br>EVA(3.2%) EAA(2%)<br>Others(10.1%)                   | Fragments<br>(13.29%)<br>Films(1.16%)                                                                                                              | 682.16µm<br>Autumn:785.59<br>±558.56µm                                                                                                                                                                                                                                                                                                                                                                                                        |     |
| Iran | Outdoor:0.47 ± 0.06<br>Indoor:0.41 ± 0.04 | Outdoor:<br>PET(30.1%) PP (21%)<br>Nylon(2.9%) PE(46%)<br>Indoor:<br>PET(30.1%) PP (29%)<br>Nylon(5.9%) PE(35%)       | Outdoor:<br>Fibers (72.4%)<br>Fragments(21.3%)<br>Pellets(6.3%)<br>Indoor:<br>Fibers (60.0%)<br>Fragments(18.3%)<br>Pellets(5.3%)<br>Others(16.4%) | Outdoor:<br><100µm(42.1%)<br>100-<br>500µm(23.8%)5<br>00-<br>1000µm(19.6%)<br>>1000µm(14.5<br>%)<br>Indoor:<br><100µm(35.3%)<br>100-<br>500µm(40.0%)5<br>00-<br>1000µm(24.7%)<br>Outdoor:<br><100µm(22.4%)<br>100-<br>500µm(32.5%)5<br>00-<br>1000µm(34.0%)<br>>1000µm(11.1<br>%)<br>Indoor:<br><100µm(42.4%)<br>100-<br>500µm(19.1%)1<br>500-<br>1000µm(24.7%)<br>Outdoor:<br><100µm(20.3%)<br>100-<br>500µm(25.3%)5<br>00-<br>1000µm(18.0%) | [7] |
|      | Outdoor:0.78 ± 0.07<br>Indoor:0.65 ± 0.06 | Outdoor:<br>PET(19.8%) PP (32%)<br>Nylon(10.2%) PE(38%)<br>Indoor:<br>PET(10%) PP (39%)<br>Nylon(10%) PE(40%)         | Outdoor:<br>Fibers (84.4%)<br>Fragments(15.6%)<br>Indoor:<br>Fibers (74.3%)<br>Fragments(15.6%)<br>Pellets(6.74%)<br>Others(3.36%)                 |                                                                                                                                                                                                                                                                                                                                                                                                                                               | [7] |
| Iran | Outdoor:0.85 ± 0.09<br>Indoor:0.73 ± 0.07 | Outdoor:<br>PET(24.3%) PP (21.3%)<br>Nylon(11%) PE(43.4%)<br>Indoor:<br>PET(30.3%) PP (20.3%)<br>Nylon(11%) PE(38.4%) | Outdoor:<br>Fibers (87.6%)<br>Fragments(11.4%)<br>Pellets(1%)<br>Indoor:<br>Fibers (93.2%)<br>Fragments(6.8%)                                      | >1000µm(36.4<br>%)<br>Indoor:<br><100µm(30.3%)<br>100-                                                                                                                                                                                                                                                                                                                                                                                        | [7] |

|             |                        |                                        |                                                |                               |      |
|-------------|------------------------|----------------------------------------|------------------------------------------------|-------------------------------|------|
|             |                        |                                        |                                                | 500µm(35.3%)500-1000µm(34.4%) |      |
| Japan       | 0.12-0.3               | PE,PP,PS,PET                           | Particles, fibers                              | <20 µm                        | [9]  |
| New Zealand | 0.03-0.12              | PP,PS                                  | Particles, fibers                              | 40-100 µm                     | [9]  |
|             |                        |                                        |                                                | ≤100µm 100-250µm              |      |
| Iran        | 0.002-0.017            | PET, Nylon,PA, PP, PS                  | Fibers                                         | 500µm 500-1000µm              | [12] |
|             |                        |                                        |                                                | >1000µm                       |      |
|             |                        |                                        |                                                | ≤100µm 100-250µm              |      |
| Iran        | 0.002-0.015            | PET, Nylon,PA, PP, PS                  | Fibers                                         | 500µm 500-1000µm              | [12] |
|             |                        |                                        |                                                | >1000µm                       |      |
|             |                        | Terrestrial transport:                 |                                                |                               |      |
|             | Terrestrial transport: | Rubber(20.6%)                          | Fragments(78.1%)                               |                               |      |
| China       | 32.0                   | PA(14.1%)                              | Fibers(16.6%)                                  | 20-271µm                      | [14] |
|             | Marine transport:      | Marine transport:                      | Granules(5.3%)                                 |                               |      |
|             | 14.7                   | PFR(14.8%)                             |                                                |                               |      |
|             |                        | PMMA(14.2%)                            |                                                |                               |      |
|             |                        |                                        |                                                | <1.0 mm                       |      |
|             |                        |                                        |                                                | 0.1-0.3mm 0.3-0.5mm           |      |
| China       | 0-0.062                | PES, PET, PE, PP, PS, PE-PP, PVC, PMMA | Fibers, Granules, Fragments, Films, Microbeads | 0.5-1mm 1-2.5mm 2.5-5mm       | [15] |

| Abbreviation    | Full Name                                |
|-----------------|------------------------------------------|
| AMPs            | Atmospheric Microplastics                |
| PE              | Polyethylene                             |
| PP              | Polypropylene                            |
| SIS             | Styrene-Isoprene-Styrene Block Copolymer |
| PEA             | Polyethyl Acrylate                       |
| PET             | Polyethylene Terephthalate               |
| PVA             | Polyvinyl Alcohol                        |
| PVC             | Polyvinyl Chloride                       |
| PAN             | Polyacrylonitrile                        |
| PS              | Polystyrene                              |
| NI              | Not Identified                           |
| PA              | Polyamide                                |
| PUR             | Polyurethane                             |
| Pol. Petr. Res. | Petroleum Resin                          |

|       |                                      |
|-------|--------------------------------------|
| PTFE  | Polytetrafluoroethylene              |
| PMMA  | Polymethyl Methacrylate              |
| PES   | Polyethersulfone                     |
| EP    | Epoxy Resin                          |
| EVAc  | Ethylene Vinyl Acetate Copolymer     |
| ABS   | Acrylonitrile Butadiene Styrene      |
| PBT   | Polybutylene Terephthalate           |
| SI    | Silicone                             |
| PEST  | Polyester                            |
| EPM   | Ethylene Propylene Monomer           |
| PVF   | Polyvinyl Fluoride                   |
| HDPE  | High-Density Polyethylene            |
| CP    | Chlorinated Polypropylene            |
| PBA   | Polybutyl Acrylate                   |
| PU    | Polyurethane                         |
| PC    | Polycarbonate                        |
| SAA   | Styrene-Acrylic Acid Copolymer       |
| EPDM  | Ethylene Propylene Diene Monomer     |
| ALK   | Alkyd Resin                          |
| PVAc  | Polyvinyl Acetate                    |
| CPE   | Chlorinated Polyethylene             |
| EVA   | Ethylene Vinyl Acetate               |
| EAA   | Ethylene Acrylic Acid                |
| PFR   | Phenolic Formaldehyde Resin          |
| PE-PP | Polyethylene-Polypropylene Copolymer |

---

Table S4. Comparison of Common Analytical Methods for Atmospheric Microplastics

| <b>Method</b>                                                 | <b>Typical size detection limit</b>                                          | <b>Quantification output</b>                                                           | <b>Polymer identification</b>             | <b>Shape / size information</b>                 | <b>Key advantages</b>                                                       | <b>Main limitations</b>                                                                         |
|---------------------------------------------------------------|------------------------------------------------------------------------------|----------------------------------------------------------------------------------------|-------------------------------------------|-------------------------------------------------|-----------------------------------------------------------------------------|-------------------------------------------------------------------------------------------------|
| <b>Filtration + visual microscopy</b>                         | ~20-300 $\mu\text{m}$<br>(dependent on membrane pore size and magnification) | Particle number (counts)                                                               | No (visual inference only)                | Yes (shape, color, size)                        | Simple, low cost, suitable for large particles and preliminary screening    | High false-positive risk; polymer type cannot be confirmed; poor resolution for small particles |
| <b>Filtration + <math>\mu\text{FTIR}</math> imaging</b>       | ~10–20 $\mu\text{m}$<br>(down to ~5 $\mu\text{m}$ with FPA imaging)          | Particle number                                                                        | Yes (polymer-specific spectra)            | Yes (particle-resolved size and shape)          | Widely accepted; relatively standardized; suitable for polymer confirmation | Limited detection of very small MPs; time-consuming; affected by filter material                |
| <b>Filtration + <math>\mu\text{Raman}</math> spectroscopy</b> | ~1 $\mu\text{m}$<br>(submicron possible under ideal conditions)              | Particle number                                                                        | Yes (polymer-specific spectra)            | Yes (particle-resolved size and shape)          | High spatial resolution; suitable for small MPs                             | Fluorescence interference; long analysis time; higher uncertainty for weathered particles       |
| <b>Pyrolysis–GC/MS</b>                                        | No explicit size limit<br>(bulk analysis)                                    | Mass concentration<br>(e.g., $\text{ng m}^{-3}$ , $\mu\text{g m}^{-2} \text{d}^{-1}$ ) | Yes (polymer-specific pyrolysis products) | No (no particle size or morphology information) | High sensitivity; robust polymer quantification;                            | Cannot provide particle number, size distribution, or shape; destructive analysis               |

|                                |                                                                       |                                            |                                                     |                                                         |                                                                                                               |                                                                                                                                                               |
|--------------------------------|-----------------------------------------------------------------------|--------------------------------------------|-----------------------------------------------------|---------------------------------------------------------|---------------------------------------------------------------------------------------------------------------|---------------------------------------------------------------------------------------------------------------------------------------------------------------|
| <b>SEM-EDS<br/>(auxiliary)</b> | ~1 µm<br>(morphology-<br>dependent)                                   | Particle<br>number (semi-<br>quantitative) | Limited<br>(elemental,<br>not polymer-<br>specific) | Yes (surface<br>morphology,<br>cracks,<br>roughness)    | Useful for<br>aging and<br>surface<br>characterization                                                        | Cannot reliably<br>identify<br>polymer type<br>alone                                                                                                          |
| <b>SERS</b>                    | Submicron to<br>nanoscale<br>(method- and<br>substrate-<br>dependent) | Particle<br>number (semi-<br>quantitative) | Yes<br>(enhanced<br>Raman<br>fingerprints)          | Limited<br>(requires<br>coupling<br>with<br>microscopy) | High<br>sensitivity;<br>reduced<br>fluorescence<br>interference;<br>potential for<br>nanoplastic<br>detection | Substrate-<br>dependent<br>reproducibility;<br>limited<br>standardization;<br>currently<br>applied mainly<br>in laboratory or<br>proof-of-<br>concept studies |

## Reference

- [1]Amato-Lourenço, L.F., dos Santos Galvão, L., Wiebeck, H., Carvalho-Oliveira, R. and Mauad, T. 2022. Atmospheric microplastic fallout in outdoor and indoor environments in São Paulo megacity. *Science of The Total Environment* 821, 153450.<https://doi.org/10.1016/j.scitotenv.2022.153450>
- [2]Ertürk Arı, P., Erdoğan, Ş., Ari, A., Ürker, O., Kankılıç, G., Çırak, T., Gaga, E. and tavşanoğlu, Ü. 2025. Atmospheric microplastic dispersion in diverse land-use context: insight from the black sea coastal region in Türkiye. *Air Quality, Atmosphere & Health* 18, 1729-1743.[10.1007/s11869-025-01735-2](https://doi.org/10.1007/s11869-025-01735-2)
- [3]Wright, S.L., Ulke, J., Font, A., Chan, K.L.A. and Kelly, F.J. 2020. Atmospheric microplastic deposition in an urban environment and an evaluation of transport. *Environment International* 136, 105411.<https://doi.org/10.1016/j.envint.2019.105411>
- [4]Luo, D., Wang, Z., Liao, Z., Chen, G., Ji, X., Sang, Y., Qu, L., Chen, Z., Wang, Z., Dahlgren, R.A., Zhang, M. and Shang, X. 2024. Airborne microplastics in urban, rural and wildland environments on the Tibetan Plateau. *Journal of Hazardous Materials* 465.[10.1016/j.jhazmat.2023.133177](https://doi.org/10.1016/j.jhazmat.2023.133177)
- [5]Abbasi, S., Ahmadi, F., Khodabakhshloo, N., Pourmahmood, H., Esfandiari, A., Mokhtarzadeh, Z., Rahnama, S., Dehbandi, R., Vazirzadeh, A. and Turner, A. 2024. Atmospheric deposition of microplastics in Shiraz, Iran. *Atmospheric Pollution Research* 15(2), 101977.<https://doi.org/10.1016/j.apr.2023.101977>
- [6]Liu, Z., Liang, T. and Liu, X. 2024. Characteristics, distribution patterns and sources of atmospheric microplastics in the Bohai and Yellow Seas, China. *Science of The Total Environment* 926, 171906.<https://doi.org/10.1016/j.scitotenv.2024.171906>
- [7]Jahedi, F., Jaafarzadeh Haghighi Fard, N., Abdullatif Khafaie, M., Hesam, S., Dehbandi, R. and Kaydi, N. 2025. Characterization of airborne microplastics and exposure assessment in the Mahshahr special economic zone, Northern Persian Gulf. *Atmospheric Pollution Research* 16(9), 102585.<https://doi.org/10.1016/j.apr.2025.102585>
- [8]Hernández-Fernández, J., Puello-Polo, E. and Trilleras, J. 2022. Characterization of Microplastics in Total Atmospheric Deposition Sampling from Areas Surrounding Industrial Complexes in Northwestern Colombia. *Sustainability* 14(20), 13613.<https://doi.org/10.3390/su142013613>
- [9]Nagato, E.G., Noothalapati, H., Kogumasaka, C., Kakii, S., Hossain, S., Iwasaki, K., Takai, Y., Shimasaki, Y., Honda, M., Hayakawa, K., Yamamoto, T. and Archer, S.D.J. 2023. Differences in microplastic degradation in the atmosphere and coastal water environment from two island nations: Japan and New Zealand. *Environmental Pollution* 333,

122011.<https://doi.org/10.1016/j.envpol.2023.122011>

- [10]Liu, Z., Bai, Y., Ma, T., Liu, X., Wei, H., Meng, H., Fu, Y., Ma, Z., Zhang, L. and Zhao, J. 2022. Distribution and possible sources of atmospheric microplastic deposition in a valley basin city (Lanzhou, China). *Ecotoxicology and Environmental Safety* 233, 113353.<https://doi.org/10.1016/j.ecoenv.2022.113353>
- [11]Liu, P., Shao, L., Li, Y., Jones, T., Cao, Y., Yang, C.-X., Zhang, M., Santosh, M., Feng, X. and BéruBé, K. 2022. Microplastic atmospheric dustfall pollution in urban environment: Evidence from the types, distribution, and probable sources in Beijing, China. *Science of The Total Environment* 838, 155989.<https://doi.org/10.1016/j.scitotenv.2022.155989>
- [12]Abbasi, S., Jaafarzadeh, N., Zahedi, A., Ravanbakhsh, M., Abbaszadeh, S. and Turner, A. 2023. Microplastics in the atmosphere of Ahvaz City, Iran. *Journal of Environmental Sciences* 126, 95-102.<https://doi.org/10.1016/j.jes.2022.02.044>
- [13]Rao, W., Fan, Y., Li, H., Qian, X. and Liu, T. 2024. New insights into the long-term dynamics and deposition-suspension distribution of atmospheric microplastics in an urban area. *Journal of Hazardous Materials* 463, 132860.<https://doi.org/10.1016/j.jhazmat.2023.132860>
- [14]Liu, P., Shao, L., Guo, Z., Zhang, Y., Cao, Y., Ma, X. and Morawska, L. 2025. Physicochemical characteristics of airborne microplastics of a typical coastal city in the Yangtze River Delta Region, China. *Journal of Environmental Sciences* 148, 602-613.<https://doi.org/10.1016/j.jes.2023.09.027>
- [15]Du, R., Lin, H., Sun, J., Zhang, J., Luo, J., Huang, X. and Pan, Z. 2024. Unveiling the suspended atmospheric microplastic pollution in a coastal urban landscape. *Journal of Cleaner Production* 442, 141145.<https://doi.org/10.1016/j.jclepro.2024.141145>
- [16]Urban-Malinga, B., Zalewski, M., Jakubowska, A., Wodzinowski, T., Malinga, M., Pałys, B. and Dąbrowska, A. 2020. Microplastics on sandy beaches of the southern Baltic Sea. *Marine Pollution Bulletin* 155, 111170.<https://doi.org/10.1016/j.marpolbul.2020.111170>
- [17]Wu, X., Zhong, C., Wang, T. and Zou, X. 2023. Assessment on the pollution level and risk of microplastics on bathing beaches: a case study of Liandao, China, p. 383.
- [18]Mohan, P.M., Tiwari, S., Karuvelan, M., Malairajan, S., Mageswaran, T. and Sachithanandam, V. 2022. A baseline study of meso and microplastic predominance in pristine beach sediment of the Indian tropical island ecosystem. *Marine Pollution Bulletin* 181, 113825.<https://doi.org/10.1016/j.marpolbul.2022.113825>
- [19]Kernchen, S., Löder, M.G.J., Fischer, F., Fischer, D., Moses, S.R., Georgi, C., Nölscher, A.C., Held, A. and Laforsch, C. 2022. Airborne microplastic concentrations and deposition across the Weser River catchment. *Science of The Total Environment* 818, 151812.<https://doi.org/10.1016/j.scitotenv.2021.151812>
- [20]Szewc, K., Graca, B. and Dołęga, A. 2021. Atmospheric deposition of microplastics in the coastal zone: Characteristics and relationship with meteorological factors. *Science of The Total Environment* 761, 143272.<https://doi.org/10.1016/j.scitotenv.2020.143272>
- [21]Jia, Q., Duan, Y., Han, X., Sun, X., Munyaneza, J., Ma, J. and Xiu, G. 2022. Atmospheric deposition of microplastics in the megalopolis (Shanghai) during rainy season: Characteristics, influence factors, and source. *Science of The Total Environment* 847, 157609.<https://doi.org/10.1016/j.scitotenv.2022.157609>
- [22]Kannankai, M.P. and Devipriya, S.P. 2024. Atmospheric microplastic deposition in a coastal city of India: The influence of a landfill source on monsoon winds. *Science of The Total Environment* 908, 168235.<https://doi.org/10.1016/j.scitotenv.2023.168235>
- [23]Hee, Y.Y., Hanif, N.M., Weston, K., Latif, M.T., Suratman, S., Rusli, M.U. and Mayes, A.G. 2023. Atmospheric microplastic transport and deposition to urban and pristine tropical locations in Southeast Asia. *Science of The Total Environment* 902, 166153.<https://doi.org/10.1016/j.scitotenv.2023.166153>
- [24]Allen, S., Allen, D., Phoenix, V.R., Le Roux, G., Durántez Jiménez, P., Simonneau, A., Binet, S. and Galop, D. 2019. Atmospheric transport and deposition of microplastics in a remote mountain catchment. *Nature Geoscience* 12(5), 339-344.[10.1038/s41561-019-0335-5](https://doi.org/10.1038/s41561-019-0335-5)
- [25]Huang, Y., He, T., Yan, M., Yang, L., Gong, H., Wang, W., Qing, X. and Wang, J. 2021. Atmospheric transport and

deposition of microplastics in a subtropical urban environment. *Journal of Hazardous Materials* 416, 126168.<https://doi.org/10.1016/j.jhazmat.2021.126168>

[26]Winijkul, E., Latt, K.Z., Limsiriwong, K., Pussayanavin, T. and Prapasongsa, T. 2024. Depositions of airborne microplastics during the wet and dry seasons in Pathum Thani, Thailand. *Atmospheric Pollution Research* 15(10), 102242.<https://doi.org/10.1016/j.apr.2024.102242>

[27]Klein, M. and Fischer, E.K. 2019. Microplastic abundance in atmospheric deposition within the Metropolitan area of Hamburg, Germany. *Science of The Total Environment* 685, 96-103.<https://doi.org/10.1016/j.scitotenv.2019.05.405>

[28]Roblin, B., Ryan, M., Vreugdenhil, A. and Aherne, J. 2020. Ambient Atmospheric Deposition of Anthropogenic Microfibers and Microplastics on the Western Periphery of Europe (Ireland). *Environmental Science & Technology* 54(18), 11100-11108.[10.1021/acs.est.0c04000](https://doi.org/10.1021/acs.est.0c04000)

[29]Tanjil, R.H., Islam, M.S., Islam, Z., Roy, S., Nahian, S. and Salam, A. 2025. Atmospheric Microplastic Pollution in Textile Industrial Areas: Source, Composition, and Health Risk Assessment. *Bulletin of Environmental Contamination and Toxicology* 114(4), 51.[10.1007/s00128-025-04021-0](https://doi.org/10.1007/s00128-025-04021-0)

[30]Tian Y, T.C., Zhou Q, et al. 2020. The temporal and spatial distribution and surface morphology of atmospheric microplastics around the Bohai Sea. *Acta Scientiae Circumstantiae*, 40(4): 1401-1409.
